# Supplementary material for: A Network Pharmacology Approach to Explore the Potential Mechanisms of Yifei Sanjie Formula in Treating Pulmonary Fibrosis
Source: Evid Based Complement Alternat Med. 2020 Nov 30;2020:8887017. doi: 10.1155/2020/8887017 (PMC7722457; doi:10.1155/2020/8887017)
Supplement: Supplementary Materials — Supplementary Table 1: basic information of ingredients in YFSJF. Supplementary Table 2: the top 20 GO functional categories. Supplementary Table 3: functions of potential target genes based on KEGG analysis. [file 8887017.f1.zip]

Archive with 4 entries (4 files):
- 8887017.f1/~$87017_Supplementary Description.docx
- 8887017.f1/Supplementary Table 1 (1).docx
- 8887017.f1/Supplementary Table 2 (1).docx
- 8887017.f1/Supplementary Table 3 (1).docx
